# Supplementary material
Source: Elsevier journal article supplement (https://www.sciencedirect.com/science/article/pii/S187034531730180X)
Supplement: mmc1 [file mmc1.docx]

**La macroecología en México: historia, avances y perspectivas**

Rodríguez, P., et al.

**Material suplementario 1**

**Figura 1 (Artículos/Año)**

*Obtención de datos a nivel mundial*

Para determinar el número de publicaciones por año referentes a *macroecología* se siguió lo propuesto por Beck (2012), pero extendiendo el periodo de búsqueda desde 1966 hasta el 11 de julio de 2016. Para realizar la búsqueda se usó la siguiente cadena: *“TS=(macroecol*)”* (Beck et al., 2012), a la cual se le incorporaron operadores booleanos y etiquetas de campo de años para facilitar la búsqueda quedando de la siguiente forma: “TS=(macroecol*) AND PY=XXXX”, donde las “X” son reemplazadas por el año de publicación. Todas las búsquedas fueron realizadas en idioma inglés para obtener mejores resultados. Como resultado de esta búsqueda se encontraron 1516 publicaciones.

*Obtención de datos para México*

Para determinar el número de publicaciones por año se siguió una estrategia diferente, debido a que los criterios de Beck (2012) arrojaron únicamente 27 trabajos generados por autores mexicanos. La búsqueda se realizó por temas que abarca la macroecología y se realizó en tres fases, cada una de ellas utilizando la base de datos de Web of Science. En la primera fase (6 de Julio, 2016) se realizó una búsqueda de artículos científicos considerando las palabras ‘macroecology’ y ‘Mexico’ en combinación con las siguientes: “species richness, rarity, species abundance, species area relationship, latitudinal patterns, occupancy and range size, range size, niche, allometry, biomass, body size, geographic ranges, species diversity, alpha, beta, y/o gamma diversity, scaling, Rapoport's rule, Bergman's rule, nestedness, local-regional plots”. Dado que esta búsqueda arrojó únicamente un total de 117 artículos (Cuadro S1), se realizó una segunda búsqueda el 7 de julio sin incluir la palabra macroecología. Los resultados arrojaron un total de 38,245 artículos (Cuadro S1), de los cuales se seleccionaron 548 que sí correspondieron a algún tema de macroecológía y en los cuales hay al menos un investigador mexicano. Debido a que un gran número de estos 548 trabajos se relacionan con temas de ecología de poblaciones y comunidades, se realizó una tercera búsqueda (14 y 15 de julio, 2016; Cuadro S2). En esta fase, se anexó una combinación de las siguientes palabras: “diversity patterns, species richness patterns, range size distribution, abundance distribution, body size distribution, body mass distribution, species area relationships, rarity, latitudinal patterns, niche, geographic ranges, scaling, alpha, beta, and/or gamma diversity”. Todas las búsquedas se realizaron considerando que la combinación estuviera contenida en el título, el resumen y/o en las palabras clave, dentro de las áreas de investigación de ciencias biológicas, ecológicas, ambientales y de conservación biológica.

Se conjuntaron en una base de datos aquellos artículos que correspondieran a los distintos temas de macroecología y se revisó detalladamente que por lo menos uno de los autores fuera investigador mexicano o que su institución de adscripción correspondiera a alguna institución mexicana. El número de total artículos encontrados en la base de datos Web of Science fue de 70.

Las búsquedas sistemáticas se complementaron con una búsqueda de artículos dirigida (‘a mano’), considerando el nombre de investigadores mexicanos que trabajan temas macroecológicos. Como resultado de esta búsqueda se adicionaron 93 artículos más, por lo que el número final de artículos fue de 163.

La base de datos se encuentra en el Material suplementario S2. Para generar la Figura 1 del texto principal se sumaron los trabajos de distintos temas de macroecología para un periodo similar a los datos obtenidos a nivel mundial.

Cuadro S1. Resultados de las búsquedas de artículos científicos publicados y registrados en la Web of Science los días 6 y 7 de julio, 2016. El tema contiene las palabras consideradas en el título, el resumen y/o en las palabras clave, dentro de las áreas de investigación de ciencias biológicas, ecológicas, ambientales y de conservación biológica.

| **Tema** | **Cadena de búsqueda** | **No. de artículos incluyendo "macroecol* en la búsqueda**  **(6 Julio 2016)** | | **No. de artículos excluyendo "macroecol* en la búsqueda**  **(7 de julio 2016)** |
| --- | --- | --- | --- | --- |
| species richness | species* richness* AND Mexic* | 16 | | 2715 |
| rarity | rarit* AND Mexic* | 3 | | 191 |
| species abundance | specie* abundance* AND Mexic* | 8 | | 6,947 |
| species area relationship | species* area* relationship* AND Mexic* | 9 | | 1200 |
| latitudinal patterns | latitud* patter* AND Mexic* | 13 | | 634 |
| occupancy and range size | occupanc* AND rang* size* AND Mexic* | 2 | | 17 |
| range size | range* size* AND Mexic* | 8 | | 2118 |
| niche | niche* AND Mexic* | 4 | | 1028 |
| allometry, biomass, body size | allometr* OR biomas* OR body* size* AND Mexic* | 9 | | 8469 |
| geographic ranges | geographic* ranges* AND Mexic* | 12 | | 546 |
| species diversity | specie* diversit* AND Mexic* | 20 | | 10,406 |
| alpha, beta, gamma diversity | alpha* OR beta* OR gamma* AND diversity* AND Mexic* | 3 | | 2,596 |
| scaling | scaling* AND Mexic* | | 5 | 285 |
| Rapoport's rule | Rapoport's rule* AND Mexic* | | 1 | 4 |
| Bergman's rule | Bergman's rule* AND Mexic* | | 1 | 1 |
| nestedness | nestedness* AND Mexic* | | 0 | 42 |
| local-regional plots | local-regional plots* AND Mexic* | | 0 | 2 |
|  | **TOTAL** | | **117** | **38, 245** |

Cuadro S2. Resultados de las búsquedas de artículos científicos publicados y registrados en la Web of Science los días 14 y 15 de julio, 2016. El tema contiene las palabras consideradas en el título, el resumen y/o en las palabras clave, dentro de las áreas de investigación de ciencias biológicas, ecológicas, ambientales y de conservación biológica.

| **Tema** | **Busqueda 14 de julio 2016** | **No. de artículos** |
| --- | --- | --- |
| Diversity pattern | large-scale OR large_scale OR larg* scale* OR macroecol* AND "diversity patterns" AND Mexic* | 143 |
| Species richness patterns | large-scale OR large_scale OR larg* scale* OR macroecol* AND "species_richness_patterns" OR "species-richness patterns" AND Mexic* | 4 |
| Range size distribution | large-scale OR large_scale OR larg* scale* OR macroecol* AND range-size* distribution* OR range* size* distribution* AND Mexic* | 65 |
| Abundance distribution | large-scale OR large_scale OR larg* scale* OR macroecol* AND abundance* distribution* OR abundance distribution* AND Mexic* | 131 |
| Body size distribution | large-scale OR large_scale OR larg* scale* OR macroecol* AND body* size* distribution* OR body-size* distribution* AND Mexic* | 25 |
| Body mass distribution | large-scale OR large_scale OR larg* scale* OR macroecol* AND body* mass* distribution* OR body-mass* distribution* AND Mexic* | 6 |
|  | **TOTAL** | **374** |

Continuación cuadro S2…

| **Tema** | **Busqueda 15 de julio 2016** | **No. de artículos** |
| --- | --- | --- |
| Species area relationships | large-scale OR large_scale OR larg* scale* OR macroecol* AND species_area_curve OR "speciesarea- curve" OR species_area_relationship* AND Mexic* | 3 |
| Rarity | large-scale OR large_scale OR larg* scale* OR macroecol* AND rarity* AND Mexic* | 10 |
| Latitudinal patterns | large-scale OR large_scale OR larg* scale* OR macroecol* AND latitudinal patterns* AND Mexic* | 30 |
| Niche | large-scale OR large_scale OR larg* scale* OR macroecol* AND niche* AND Mexic* | 29 |
| Geographic ranges | large-scale OR large_scale OR larg* scale* OR macroecol* AND "geographic_ranges" OR "geographic-ranges" AND Mexic* | 5 |
| Scaling | large-scale OR large_scale OR larg* scale* OR macroecol* AND scaling* AND Mexic* | 34 |
| Alpha, beta, or gamma diversity | large-scale OR large_scale OR larg* scale* OR macroecol* AND scaling* AND Mexic* | 54 |
|  | **TOTAL** | **196** |

**Figura 2 (Artículos/Taxa)**

*Obtención de datos a nivel mundial*

Para determinar el número de publicaciones por taxa referentes a *macroecología* se combinaron dos cadenas de búsqueda; la primera para artículos sobre macroecología: *“TS=(macroecol*)”* y una segunda en la cual se le incorporaron operadores booleanos y etiquetas de campo alusivos a cada taxa:

| Criterios de búsqueda usados en la generación de la figura XX | |
| --- | --- |
| Taxa | Cadena de búsqueda |
| Mamíferos | TS=mammal* |
| Aves | TS=(bird* OR avian*) |
| Reptiles | TS=reptil* |
| Anfibios | TS=amphib* |
| Artrópodos | TS=(insect* OR hexapoda OR archaeognatha OR balttodea OR coleoptera OR dermaptera OR diptera OR embiidina OR ephemeroptera OR gryllblattodea OR hemiptera OR hymenoptera OR isoptera OR lepidoptera OR mantodea OR mantophasmatodea OR mecoptera OR neuroptera OR odonata OR orthoptera OR phasmida OR phthiraptera OR plecoptera OR psocoptera OR raphidioptera OR siphonaptera OR strepsiptera OR thysanoptera OR trichoptera OR zoraptera OR zygentoma OR butterfl* OR moth* OR bees OR beetles OR dragonfl* OR grasshopper* OR spiders OR crayfish OR arachn* OR branchiopoda OR cephalocarida OR chilopoda OR diplopoda OR entognatha OR malacostraca OR maxillopoda OR ostracoda OR pycnogonida OR remipedia) |
| Invertebrados no artrópodos |  |

*Obtención de datos para México*

A partir de la base de datos que se generó resultado de las búsquedas que se detallan en la primera parte de este documento (Figura 1; *Obtención de datos para México*) y que corresponde al Material suplementario S2, para generar la Figura 2 se agregó a esa base de datos el campo ‘Grupo taxonómico’ en el cual se vació la información obtenida de la revisión de los títulos, o en algunos casos, de la consulta de los resúmenes o de los artículos. Se utilizaron las mismas categorías que se utilizaron para los datos a nivel mundial.

**Figura 3 (Artículos/Hábitat)**

*Obtención de datos a nivel mundial*

 Para determinar el número de publicaciones por hábitat referentes a macroecología se combinaron dos cadenas de búsqueda; la primera para artículos sobre macroecología: “TS=(macroecol*)” y una segunda en la cual se incorporaron operadores booleanos y etiquetas de campo alusivos a cada tipo de hábitat. Se encontraron 1265 publicaciones, de las cuales las terrestres representaron el 56% del total (710 publicaciones), seguidas por las marinas (441) y dulceacuícolas (114). Los criterios se presentan en la siguiente tabla.

| Criterios de búsqueda usados en la generación de la figura XX | |
| --- | --- |
| Bioma | Cadena de búsqueda |
| Terrestre | TS=(terr* OR land* OR global* OR world* OR europe* OR "north america*" OR "south america*" OR asia* OR africa* OR australia* OR oceania* OR antarct*) NOT TS=("fresh water" OR limn* OR river* OR lake* OR marine OR sea OR ocean*) |
| Marino | TS=(marine* OR sea* OR ocean*) |
| Dulceacuícola | TS=(fresh water* OR limn* OR river* OR lake*) |

*Obtención de datos para México*

A partir de la base de datos que se generó resultado de las búsquedas que se detallan en la primera parte de este documento (Figura 1; *Obtención de datos para México*) y que corresponde al Material suplementario S2, para generar la Figura 3 se agregó un campo ‘Habitat’ en el cual se vació la información obtenida de la revisión de los títulos, o en algunos casos, de la consulta de los resúmenes o de los artículos. Se utilizaron las mismas categorías que se utilizaron para los datos a nivel mundial.

**Figura 4 (Artículos/Extensión geográfica)**

*Obtención de datos para México*

A partir de la base de datos que se generó resultado de las búsquedas que se detallan en la primera parte de este documento (Figura 1; *Obtención de datos para México*) y que corresponde al Material suplementario S2, para generar la Figura 4 se agregó un campo ‘Escala geográfica’, en la cual se vació la información obtenida de la revisión de los títulos, o en algunos casos, de la consulta de los resúmenes o de los artículos.

**Figura 5 (Artículos/Temas)**

*Obtención de datos para México*

A partir de la base de datos que se generó resultado de las búsquedas que se detallan en la primera parte de este documento (Figura 1; *Obtención de datos para México*) y que corresponde al Material suplementario S2, para generar la Figura 5 se agregó un campo ‘Temas’, en el cual se vació la información obtenida de la revisión de los títulos, o en algunos casos, de la consulta de los resúmenes o de los artículos.
